# Supplementary material for: A Class III asymmetric binuclear cyanido-bridged mixed-valence complex
Source: Royal Society of Chemistry journal article supplement (doi:10.1039/d2nj00311b), 2022-01-01
Supplement: d2nj00311b1.pdf [file d2nj00311b1.pdf]

## **A Class III asymmetric binuclear cyanido-bridged mixed-valence complex**

*Xiao-Lin Liu,<sup>ab</sup> Yi Li,<sup>ab</sup> Qing-Dou Xu,<sup>b</sup> Zi-Qin Wei,<sup>b</sup> Xin-Tao Wu<sup>b</sup> and Tian-Lu Sheng<sup>\*b</sup>*

<sup>a</sup>College of Chemistry, Fuzhou University, Fuzhou 350002, P. R. China

<sup>b</sup>State Key Laboratory of Structural Chemistry, Fujian Institute of Research on the Structure of Matter, Chinese

Academy of Science, Fuzhou, Fujian 350002, P. R. China

E-mail: [tsheng@fjirsm.ac.cn](mailto:tsheng@fjirsm.ac.cn)

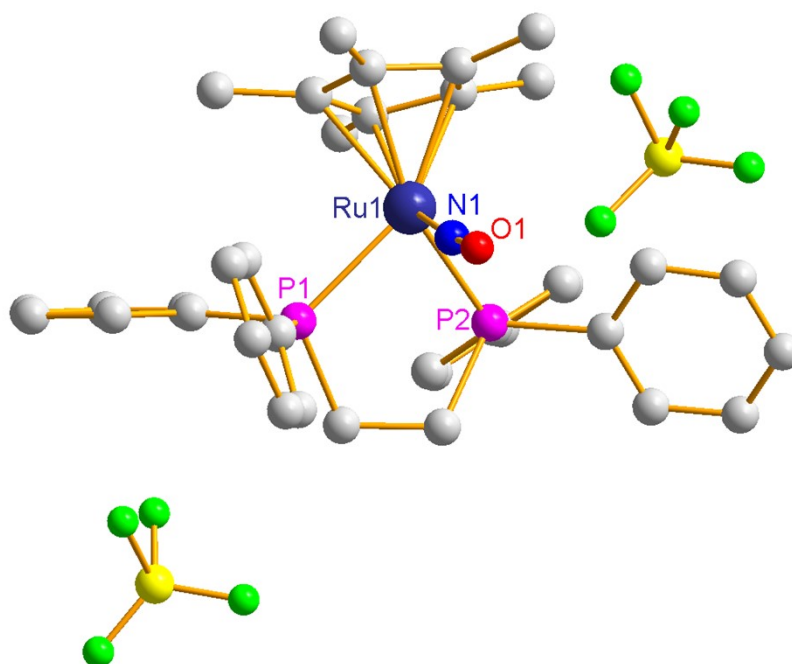

**Figure S1.** Molecular structure of compound  $[\text{Cp}^*(\text{dpe})\text{Ru}(\text{NO})][\text{BF}_4]_2$ . Hydrogen atoms, and solvent molecules have been omitted for clarity. Ru dark blue, P pink, C white, N blue, F green, B yellow, O red. The Ru-P bond lengths are 2.3792(7) and 2.4119(6) Å.

**Table S1.** Crystallographic data for  $1[\text{BF}_4] \cdot \text{CH}_2\text{Cl}_2$  and  $1[\text{BF}_4]_2$ .

|                                   | $1[\text{BF}_4] \cdot \text{CH}_2\text{Cl}_2$                                     | $1[\text{BF}_4]_2$                                                                         | $[\text{Cp}^*(\text{dpe})\text{Ru}(\text{NO})][\text{BF}_4]_2$        |
|-----------------------------------|-----------------------------------------------------------------------------------|--------------------------------------------------------------------------------------------|-----------------------------------------------------------------------|
| Empirical formula                 | $\text{C}_{58}\text{H}_{57}\text{BCl}_3\text{F}_4\text{N}_5\text{P}_2\text{Ru}_2$ | $\text{C}_{58}\text{H}_{57}\text{B}_2\text{Cl}_3\text{F}_8\text{N}_5\text{P}_2\text{Ru}_2$ | $\text{C}_{36}\text{H}_{39}\text{B}_2\text{F}_8\text{NOP}_2\text{Ru}$ |
| Color and Habit                   | Red purple block                                                                  | Dark red block                                                                             | Light orange plate                                                    |
| Crystal Size (mm)                 | 0.230×0.150×0.230                                                                 | 0.230×0.130×0.120                                                                          | 0.230×0.110×0.110                                                     |
| Temperature(K)                    | 293(2)                                                                            | 293(2)                                                                                     | 293(2)                                                                |
| Crystal system                    | Monoclinic                                                                        | Triclinic                                                                                  | Triclinic                                                             |
| Space group                       | $P2_1/n$                                                                          | $P-1$                                                                                      | $P-1$                                                                 |
| a (Å)                             | 11.0409(3)                                                                        | 12.2343(4)                                                                                 | 8.87820(10)                                                           |
| b (Å)                             | 12.7863(4)                                                                        | 13.0543(4)                                                                                 | 12.3726(2)                                                            |
| c (Å)                             | 39.5972(12)                                                                       | 21.7618(3)                                                                                 | 18.0161(2)                                                            |
| alpha (deg.)                      | 90                                                                                | 86.764(2)                                                                                  | 84.1790(10)                                                           |
| beta (deg.)                       | 91.115(2)                                                                         | 78.308(2)                                                                                  | 78.8260(10)                                                           |
| gamma (deg.)                      | 90                                                                                | 62.126(3)                                                                                  | 73.611(2)                                                             |
| Volume(Å <sup>3</sup> )           | 5589.0(3)                                                                         | 3005.65(16)                                                                                | 1860.30(5)                                                            |
| Z                                 | 4                                                                                 | 2                                                                                          | 2                                                                     |
| Formula weight                    | 1281.32                                                                           | 1368.13                                                                                    | 838.31                                                                |
| Density(cal.)(Mg/m <sup>3</sup> ) | 1.523                                                                             | 1.512                                                                                      | 1.497                                                                 |
| $\mu$ (mm <sup>-1</sup> )         | 4.504                                                                             | 4.274                                                                                      | 3.243                                                                 |
| F(000)                            | 2600.0                                                                            | 1382.0                                                                                     | 852.0                                                                 |
| Theta range (deg.)                | 3.88 to 121.284                                                                   | 6.666 to 121.182                                                                           | 9.166 to 121.82                                                       |
| Reflections collected / unique    | 47272 / 12488<br>[R(int) = 0.0596]                                                | 41976 / 13232<br>[R(int) = 0.0957]                                                         | 25889 / 8310<br>[R(int) = 0.0368]                                     |
| Index range                       | -14<=h<=10,<br>-16<=k<=15,<br>-51<=l<=51                                          | -15<=h<=15,<br>-16<=k<=16,<br>-27<=l<=27                                                   | -11<=h<=11,<br>-12<=k<=16,<br>-23<=l<=22                              |
| Data/restraints/parameters (obs.) | 12488/0/681                                                                       | 13232/47/736                                                                               | 8310/19/538                                                           |

|                        |                                    |                                    |                                    |
|------------------------|------------------------------------|------------------------------------|------------------------------------|
| Final R indices (obs.) | $R_1 = 0.0420,$<br>$wR_2 = 0.1042$ | $R_1 = 0.0760,$<br>$wR_2 = 0.2063$ | $R_1 = 0.0403,$<br>$wR_2 = 0.1085$ |
| R indices (all)        | $R_1 = 0.0582,$<br>$wR_2 = 0.1120$ | $R_1 = 0.0895,$<br>$wR_2 = 0.2178$ | $R_1 = 0.0444,$<br>$wR_2 = 0.1111$ |
| Goodness-of-fit        | 1.057                              | 1.051                              | 1.034                              |

$$R_1 = \frac{\sum(|F_o| - |F_c|)}{\sum|F_o|};$$

$$wR_2 = \left[ \frac{\sum w(|F_o|^2 - |F_c|^2)^2}{\sum w|F_o|^2} \right]^{1/2}$$

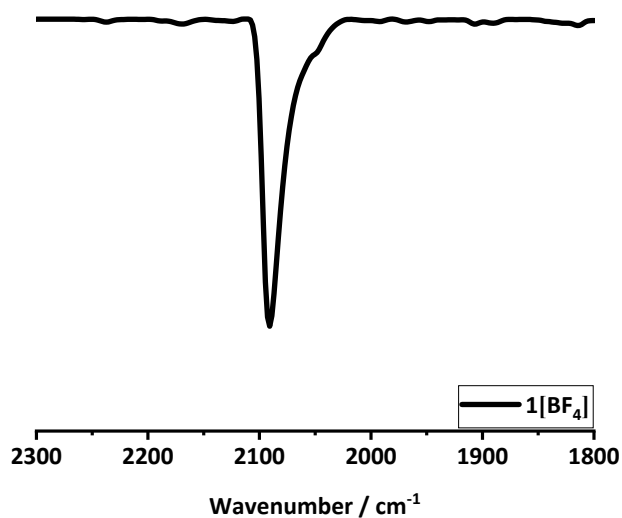

Figure S2. IR<sub>KBr</sub> spectra of 1[BF<sub>4</sub>] (2090 cm<sup>-1</sup>).

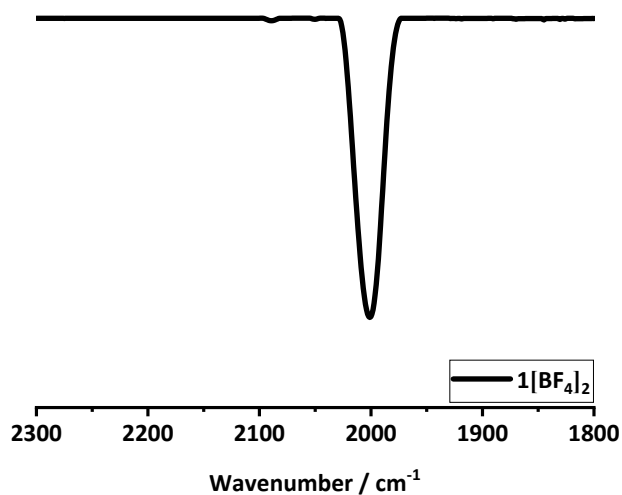

Figure S3. IR<sub>KBr</sub> spectra of 1[BF<sub>4</sub>]<sub>2</sub> (2000 cm<sup>-1</sup>).

**Table S2.** Experimental data and TDDFT data of the MMCT band (in CH<sub>2</sub>Cl<sub>2</sub>) for MV complex **1**[BF<sub>4</sub>]<sub>2</sub>.

|                   | $\lambda$ (cm <sup>-1</sup> )                                              |
|-------------------|----------------------------------------------------------------------------|
| Experimental data | 8461 cm <sup>-1</sup> , ( $\epsilon = 4116 \text{ M}^{-1}\text{cm}^{-1}$ ) |
| TDDFT data        | 7255 cm <sup>-1</sup>                                                      |

**Table S3.** Data of the electron spin density for MV complex **1**[BF<sub>4</sub>]<sub>2</sub>.

| complexes                                | Ru(1) | Ru(2) |
|------------------------------------------|-------|-------|
| <b>1</b> [BF <sub>4</sub> ] <sub>2</sub> | 0.473 | 0.406 |

**Table S4.** Calculated and experimental electronic absorption in CH<sub>2</sub>Cl<sub>2</sub> of **1**[BF<sub>4</sub>]<sub>2</sub> (MMCT).

| Complex                                  | Excitation (percentage)                       |
|------------------------------------------|-----------------------------------------------|
| <b>1</b> [BF <sub>4</sub> ] <sub>2</sub> | HOMO (239B) $\rightarrow$ LUMO (240B) (65%)   |
|                                          | HOMO-2 (237B) $\rightarrow$ LUMO (240B) (22%) |
|                                          | HOMO-3 (236B) $\rightarrow$ LUMO (240B) (7%)  |
|                                          | HOMO-1 (238B) $\rightarrow$ LUMO (240B) (3%)  |

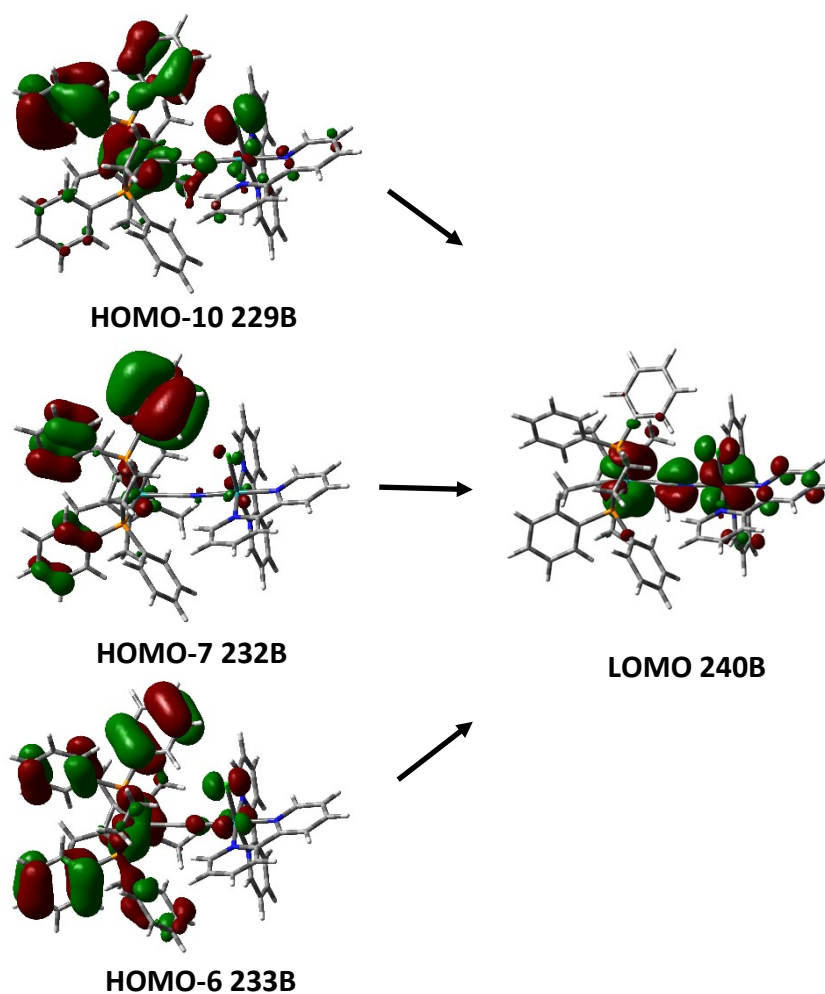

**Figure S4.** Molecular orbital diagrams of HOMO-10 (229B), HOMO-7 (232B), HOMO-6 (233B) and LUMO (240B) of **1**[BF<sub>4</sub>]<sub>2</sub> in dichloromethane (isocontour value: 0.02 [e/b3]<sup>1/2</sup>).

**Table S5.** Calculated and experimental electronic absorption in CH<sub>2</sub>Cl<sub>2</sub> of **1[BF<sub>4</sub>]<sub>2</sub>** (LMCT).

| Complex                              | Excitation (percentage)            |
|--------------------------------------|------------------------------------|
| <b>1[BF<sub>4</sub>]<sub>2</sub></b> | HOMO-10 (229B) → LUMO (240B) (12%) |
|                                      | HOMO-7 (232B) → LUMO (240B) (23%)  |
|                                      | HOMO-6 (233B) → LUMO (240B) (36%)  |

**Table S6.** Theoretical bond lengths (Å) for **1[BF<sub>4</sub>]** and **1[BF<sub>4</sub>]<sub>2</sub>**.

|             | <b>1[BF<sub>4</sub>]</b> | <b>1[BF<sub>4</sub>]<sub>2</sub></b> |
|-------------|--------------------------|--------------------------------------|
| Ru(1)-C(1)  | 2.0039                   | 1.9743                               |
| Ru(1)-P(1)  | 2.4193                   | 2.4573                               |
| Ru(1)-P(2)  | 2.4223                   | 2.4586                               |
| Ru(1)-N(1)  | 2.0966                   | 2.0116                               |
| Ru(2)-N(3)  | 2.0665                   | 2.0791                               |
| Ru(2)-N(4)  | 2.0771                   | 2.0895                               |
| Ru(2)-N(5)  | 2.0757                   | 2.0948                               |
| Ru(2)-N(6)  | 2.0554                   | 2.0972                               |
| Ru(2)-Cl(1) | 2.5073                   | 2.4708                               |
| N(1)≡C(1)   | 1.1939                   | 1.2016                               |

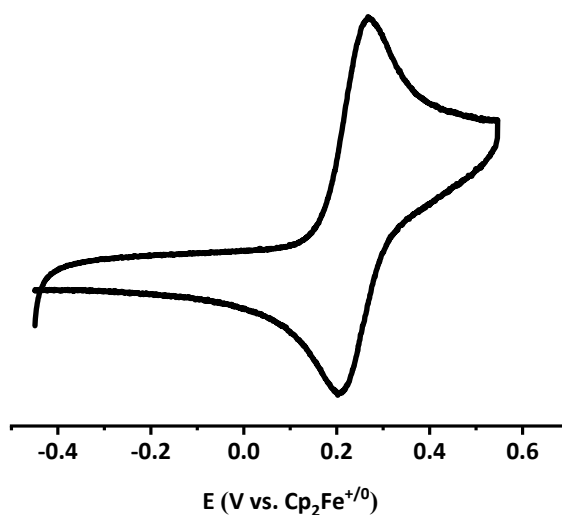**Figure S5.** Cyclic voltammogram of **[Cp\*(dppe)RuCN]** recorded in CH<sub>2</sub>Cl<sub>2</sub> / 0.1M [TBA]PF<sub>6</sub> at 100 mV s<sup>-1</sup> scan rate.

#### Author Contributions

X.-L. L. synthesized and characterized the molecules. T.-L. S. performed and analysed the DFT/TDDFT calculations. Y. L. contributed to the determination of single crystal structure. T.-L. S. and X.-L. L. wrote the text. T.L.S. conceived and supervised the project. All authors discussed the results and contributed to the writing of the manuscript.

Optimized Cartesian Coordinates of **1[BF<sub>4</sub>]<sub>2</sub>**

|    |          |          |          |   |          |          |          |
|----|----------|----------|----------|---|----------|----------|----------|
| Ru | -1.90613 | -0.26395 | 0.940226 | C | -6.53034 | 2.764315 | -0.79301 |
| Ru | 3.112906 | -0.13269 | -0.31981 | H | -7.39839 | 2.426624 | -1.35276 |
| P  | -2.44009 | -1.43751 | -1.1517  | C | -6.62712 | -1.53377 | -1.34507 |
| P  | -2.48025 | 1.682492 | -0.44771 | H | -7.46116 | -1.21128 | -0.72687 |
| Cl | 2.718884 | -1.43951 | -2.3794  | C | -5.05626 | 0.143948 | 2.573206 |
| N  | 3.159189 | 1.523292 | -1.60187 | H | -5.1906  | 1.072025 | 2.007519 |
| N  | 1.149872 | -0.05475 | 0.112456 | H | -5.39139 | 0.339773 | 3.601774 |
| N  | 3.64189  | 0.780907 | 1.471315 | H | -5.73194 | -0.61039 | 2.159153 |
| N  | 3.264883 | -1.78048 | 0.955965 | C | 3.7538   | -2.52599 | 3.20615  |
| C  | -1.63211 | -3.10083 | -1.4532  | H | 4.042009 | -2.30155 | 4.226843 |
| C  | -0.02314 | -0.11293 | 0.36642  | C | 4.454706 | 1.81858  | 3.949026 |
| N  | 5.125155 | -0.1131  | -0.91051 | H | 4.776933 | 2.217473 | 4.905786 |
| C  | -4.15215 | 2.543247 | -0.26291 | C | 4.234418 | 2.673461 | 2.851488 |
| C  | -3.62436 | -0.3282  | 2.583975 | H | 4.381372 | 3.745089 | 2.933938 |
| C  | 5.449029 | 0.822512 | -1.86321 | C | 4.472944 | 2.7233   | -3.24174 |
| C  | -4.26798 | 3.637498 | 0.625918 | H | 5.411695 | 2.871178 | -3.76223 |
| H  | -3.39792 | 4.00918  | 1.159867 | C | 2.08671  | 2.296608 | -1.91161 |
| C  | 4.35115  | 1.72587  | -2.25795 | H | 1.174508 | 2.088377 | -1.36963 |
| C  | -1.74153 | -1.72727 | 2.729612 | C | 3.828359 | 2.118759 | 1.631623 |
| C  | -4.21765 | -1.73237 | -1.6967  | H | 3.648606 | 2.736644 | 0.760431 |
| C  | -1.78862 | -0.25255 | -2.49065 | C | -4.46138 | -2.37088 | -2.93561 |
| H  | -0.69868 | -0.22351 | -2.40518 | H | -3.63493 | -2.71803 | -3.55114 |
| H  | -2.04564 | -0.64812 | -3.47951 | C | -6.86701 | -2.16952 | -2.57667 |
| C  | -2.40651 | 1.147895 | -2.2965  | H | -7.88552 | -2.34343 | -2.91296 |
| H  | -3.42637 | 1.172929 | -2.6906  | C | 3.511248 | -3.85576 | 2.823573 |
| H  | -1.82526 | 1.898188 | -2.84194 | H | 3.613652 | -4.6598  | 3.545823 |
| C  | -3.15843 | -1.6779  | 2.399052 | C | -6.63962 | 3.852981 | 0.091645 |
| C  | -1.32466 | 3.170207 | -0.32945 | H | -7.59162 | 4.360452 | 0.220264 |
| C  | -4.00134 | -2.89013 | 2.107622 | C | 7.718792 | -0.03753 | -1.97432 |
| H  | -3.42969 | -3.67155 | 1.597876 | H | 8.720441 | -0.00924 | -2.39155 |
| H  | -4.8813  | -2.66039 | 1.502255 | C | -1.45152 | 4.233156 | -1.25382 |
| H  | -4.35953 | -3.31789 | 3.05556  | H | -2.18831 | 4.185    | -2.05256 |
| C  | 3.849259 | -0.06611 | 2.537603 | C | 3.021512 | -3.06612 | 0.585269 |
| C  | -2.49712 | 0.469609 | 3.058297 | H | 2.742747 | -3.21125 | -0.45196 |
| C  | -5.30558 | -1.31313 | -0.90906 | C | 7.373825 | -0.99182 | -0.99958 |
| H  | -5.12747 | -0.80791 | 0.03329  | H | 8.093414 | -1.72077 | -0.64318 |
| C  | -1.34557 | -0.40178 | 3.17045  | C | -0.43583 | -5.62411 | -1.88216 |
| C  | -0.90343 | -2.97532 | 2.801611 | H | 0.016858 | -6.59501 | -2.06624 |
| H  | -1.07154 | -3.49645 | 3.756154 | C | -1.74983 | -5.5417  | -1.37945 |
| H  | 0.165332 | -2.74781 | 2.732497 | H | -2.31264 | -6.4477  | -1.17088 |
| H  | -1.14674 | -3.67762 | 1.99747  | C | 3.13687  | -4.12833 | 1.494213 |
| C  | -0.02496 | -0.04162 | 3.795699 | H | 2.938583 | -5.14106 | 1.160395 |
| H  | -0.04257 | -0.28    | 4.869205 | C | -5.77986 | -2.58437 | -3.37321 |
| H  | 0.193496 | 1.027454 | 3.701872 | H | -5.95864 | -3.07689 | -4.32504 |

|   |          |          |          |   |          |          |          |
|---|----------|----------|----------|---|----------|----------|----------|
| H | 0.802215 | -0.59855 | 3.344813 | C | 3.364694 | 3.522967 | -3.5603  |
| C | -5.29655 | 2.108498 | -0.96556 | H | 3.445396 | 4.291739 | -4.32237 |
| H | -5.25237 | 1.268431 | -1.65063 | C | -5.50326 | 4.286275 | 0.80173  |
| C | -0.31168 | -3.18444 | -1.93842 | H | -5.57423 | 5.13188  | 1.480597 |
| H | 0.277373 | -2.29845 | -2.1541  | C | -0.66084 | 5.388732 | -1.12052 |
| C | 3.623088 | -1.49717 | 2.254849 | H | -0.7792  | 6.20771  | -1.82518 |
| C | -0.4011  | 3.281818 | 0.728015 | C | 0.383694 | 4.443784 | 0.866891 |
| H | -0.29987 | 2.468447 | 1.439976 | H | 1.07507  | 4.531295 | 1.701699 |
| C | 6.068658 | -0.99656 | -0.49237 | C | 2.152631 | 3.306803 | -2.88101 |
| H | 5.760342 | -1.7255  | 0.245502 | H | 1.271577 | 3.902322 | -3.09103 |
| C | 4.257626 | 0.438879 | 3.786611 | C | 0.278234 | -4.44345 | -2.16107 |
| H | 4.428257 | -0.23223 | 4.620524 | H | 1.284898 | -4.48902 | -2.56852 |
| C | 6.745684 | 0.876539 | -2.40589 | C | 0.256273 | 5.499076 | -0.05513 |
| H | 6.996344 | 1.613037 | -3.15997 | H | 0.849288 | 6.402536 | 0.060322 |
| C | -2.34802 | -4.28705 | -1.16794 | H | -1.66312 | 2.42325  | 3.521754 |
| H | -3.3762  | -4.24268 | -0.81891 | H | -2.88188 | 1.840448 | 4.660385 |
| C | -2.60562 | 1.871078 | 3.595832 | H | -3.38026 | 2.444111 | 3.078736 |

The theoretically calculated bond length of **1[BF<sub>4</sub>]**.

|         |        |           |        |
|---------|--------|-----------|--------|
| R(1,3)  | 2.5073 | R(41,42)  | 1.0829 |
| R(1,6)  | 2.0966 | R(41,119) | 1.3987 |
| R(1,7)  | 2.0665 | R(43,44)  | 1.0958 |
| R(1,8)  | 2.0757 | R(43,45)  | 1.0938 |
| R(1,9)  | 2.0771 | R(43,52)  | 1.5446 |
| R(1,10) | 2.0554 | R(46,47)  | 1.0875 |
| R(2,4)  | 2.4193 | R(46,50)  | 1.4072 |
| R(2,5)  | 2.4223 | R(46,105) | 1.4094 |
| R(2,12) | 2.0039 | R(48,49)  | 1.0823 |
| R(2,28) | 2.3454 | R(48,73)  | 1.3992 |
| R(2,33) | 2.3017 | R(50,51)  | 1.0872 |
| R(2,35) | 2.3622 | R(50,57)  | 1.4087 |
| R(2,36) | 2.2829 | R(52,53)  | 1.0951 |
| R(2,40) | 2.3338 | R(52,54)  | 1.0944 |
| R(4,11) | 1.8922 | R(55,56)  | 1.0856 |
| R(4,16) | 1.8962 | R(55,73)  | 1.4083 |
| R(4,52) | 1.931  | R(57,58)  | 1.0853 |
| R(5,27) | 1.8911 | R(59,60)  | 1.0848 |
| R(5,29) | 1.8805 | R(59,63)  | 1.4088 |
| R(5,43) | 1.9079 | R(61,62)  | 1.0877 |
| R(6,12) | 1.1939 | R(61,103) | 1.4072 |
| R(7,15) | 1.3772 | R(63,64)  | 1.0858 |
| R(7,48) | 1.3608 | R(63,75)  | 1.4034 |
| R(8,17) | 1.3614 | R(65,66)  | 1.088  |
| R(8,37) | 1.3779 | R(65,95)  | 1.4068 |

|           |        |            |        |
|-----------|--------|------------|--------|
| R(9,19)   | 1.3595 | R(67,68)   | 1.0862 |
| R(9,32)   | 1.3769 | R(67,91)   | 1.4069 |
| R(10,34)  | 1.3813 | R(69,70)   | 1.0945 |
| R(10,41)  | 1.3633 | R(69,71)   | 1.1003 |
| R(11,23)  | 1.4084 | R(69,72)   | 1.0944 |
| R(11,65)  | 1.4136 | R(73,74)   | 1.0849 |
| R(13,14)  | 1.084  | R(75,76)   | 1.0844 |
| R(13,15)  | 1.4075 | R(77,78)   | 1.0869 |
| R(13,55)  | 1.4017 | R(77,105)  | 1.406  |
| R(15,32)  | 1.4728 | R(79,80)   | 1.0943 |
| R(16,30)  | 1.412  | R(79,81)   | 1.1007 |
| R(16,67)  | 1.4139 | R(79,82)   | 1.0953 |
| R(17,18)  | 1.084  | R(83,84)   | 1.0951 |
| R(17,59)  | 1.4014 | R(83,85)   | 1.1003 |
| R(19,20)  | 1.0815 | R(83,86)   | 1.0965 |
| R(19,25)  | 1.4009 | R(87,88)   | 1.0872 |
| R(21,22)  | 1.084  | R(87,97)   | 1.4072 |
| R(21,32)  | 1.407  | R(89,90)   | 1.0844 |
| R(21,38)  | 1.4026 | R(89,107)  | 1.4094 |
| R(23,24)  | 1.086  | R(91,92)   | 1.0872 |
| R(23,61)  | 1.4092 | R(91,97)   | 1.4079 |
| R(25,26)  | 1.0841 | R(93,94)   | 1.0872 |
| R(25,38)  | 1.4075 | R(93,107)  | 1.4067 |
| R(27,89)  | 1.4069 | R(93,109)  | 1.4103 |
| R(27,101) | 1.4141 | R(95,96)   | 1.0874 |
| R(28,35)  | 1.4442 | R(95,103)  | 1.4102 |
| R(28,36)  | 1.4503 | R(97,98)   | 1.0869 |
| R(28,69)  | 1.5067 | R(99,100)  | 1.0843 |
| R(29,57)  | 1.4091 | R(99,121)  | 1.4018 |
| R(29,77)  | 1.4144 | R(101,102) | 1.0875 |
| R(30,31)  | 1.0852 | R(101,109) | 1.4058 |
| R(30,87)  | 1.4077 | R(103,104) | 1.0873 |
| R(33,36)  | 1.4606 | R(105,106) | 1.0874 |
| R(33,40)  | 1.4393 | R(107,108) | 1.0875 |
| R(33,115) | 1.5057 | R(109,110) | 1.0871 |
| R(34,37)  | 1.4732 | R(111,112) | 1.0952 |
| R(34,99)  | 1.4083 | R(111,113) | 1.1013 |
| R(35,40)  | 1.4584 | R(111,114) | 1.0954 |
| R(35,83)  | 1.5094 | R(115,116) | 1.0958 |
| R(36,111) | 1.5065 | R(115,117) | 1.1006 |
| R(37,75)  | 1.408  | R(115,118) | 1.0945 |
| R(38,39)  | 1.0858 | R(119,120) | 1.0852 |
| R(40,79)  | 1.5065 | R(119,121) | 1.4098 |
|           |        | R(121,122) | 1.0856 |



The theoretically calculated bond length of **1[BF<sub>4</sub>]<sub>2</sub>**.

|           |        |           |        |
|-----------|--------|-----------|--------|
| R(1,3)    | 2.4573 | R(42,44)  | 1.0952 |
| R(1,4)    | 2.4586 | R(42,45)  | 1.0944 |
| R(1,11)   | 1.9743 | R(46,47)  | 1.0849 |
| R(1,14)   | 2.3787 | R(46,65)  | 1.4079 |
| R(1,19)   | 2.3174 | R(48,49)  | 1.0856 |
| R(1,27)   | 2.3866 | R(48,119) | 1.4081 |
| R(1,34)   | 2.3181 | R(50,73)  | 1.4073 |
| R(1,37)   | 2.3037 | R(51,52)  | 1.0857 |
| R(2,5)    | 2.4708 | R(51,115) | 1.409  |
| R(2,6)    | 2.0948 | R(53,54)  | 1.0821 |
| R(2,7)    | 2.0116 | R(53,99)  | 1.4003 |
| R(2,8)    | 2.0791 | R(55,56)  | 1.0839 |
| R(2,9)    | 2.0895 | R(55,75)  | 1.4031 |
| R(2,12)   | 2.0972 | R(57,58)  | 1.0835 |
| R(3,10)   | 1.8736 | R(57,93)  | 1.4031 |
| R(3,20)   | 1.8825 | R(59,60)  | 1.0867 |
| R(3,21)   | 1.903  | R(59,103) | 1.406  |
| R(4,13)   | 1.8895 | R(61,62)  | 1.0948 |
| R(4,24)   | 1.9259 | R(61,63)  | 1.1002 |
| R(4,28)   | 1.8875 | R(61,64)  | 1.0935 |
| R(6,18)   | 1.3756 | R(65,66)  | 1.0867 |
| R(6,81)   | 1.358  | R(65,91)  | 1.407  |
| R(7,11)   | 1.2016 | R(67,68)  | 1.0871 |
| R(8,33)   | 1.3775 | R(67,87)  | 1.4066 |
| R(8,83)   | 1.3603 | R(69,70)  | 1.0952 |
| R(9,50)   | 1.3768 | R(69,71)  | 1.0994 |
| R(9,97)   | 1.36   | R(69,72)  | 1.0941 |
| R(10,48)  | 1.4092 | R(73,74)  | 1.0841 |
| R(10,59)  | 1.4146 | R(73,89)  | 1.4048 |
| R(12,15)  | 1.374  | R(75,76)  | 1.0855 |
| R(12,53)  | 1.3585 | R(75,77)  | 1.4085 |
| R(13,16)  | 1.4145 | R(77,78)  | 1.0848 |
| R(13,46)  | 1.4115 | R(77,83)  | 1.4002 |
| R(14,27)  | 1.4398 | R(79,80)  | 1.0835 |
| R(14,34)  | 1.4602 | R(79,109) | 1.4033 |
| R(14,69)  | 1.5078 | R(81,82)  | 1.0813 |
| R(15,18)  | 1.4755 | R(81,117) | 1.4016 |
| R(15,57)  | 1.4067 | R(83,84)  | 1.0831 |
| R(16,17)  | 1.0864 | R(85,86)  | 1.0874 |
| R(16,111) | 1.4063 | R(85,107) | 1.4055 |
| R(18,79)  | 1.4063 | R(87,88)  | 1.0866 |
| R(19,27)  | 1.4558 | R(87,107) | 1.4101 |

|          |        |            |        |
|----------|--------|------------|--------|
| R(19,37) | 1.4519 | R(89,90)   | 1.0856 |
| R(19,38) | 1.5051 | R(89,105)  | 1.4077 |
| R(20,35) | 1.407  | R(91,92)   | 1.0864 |
| R(20,85) | 1.4149 | R(91,111)  | 1.4083 |
| R(21,22) | 1.0937 | R(93,94)   | 1.0854 |
| R(21,23) | 1.0956 | R(93,99)   | 1.407  |
| R(21,24) | 1.543  | R(95,96)   | 1.0877 |
| R(24,25) | 1.0936 | R(95,113)  | 1.4065 |
| R(24,26) | 1.0947 | R(97,98)   | 1.0838 |
| R(27,29) | 1.505  | R(97,105)  | 1.4028 |
| R(28,51) | 1.4084 | R(99,100)  | 1.0845 |
| R(28,95) | 1.4144 | R(101,102) | 1.0869 |
| R(29,30) | 1.0942 | R(101,103) | 1.4093 |
| R(29,31) | 1.0925 | R(101,119) | 1.4077 |
| R(29,32) | 1.0999 | R(103,104) | 1.0868 |
| R(33,50) | 1.4762 | R(105,106) | 1.0846 |
| R(33,55) | 1.4078 | R(107,108) | 1.0865 |
| R(34,37) | 1.4484 | R(109,110) | 1.0855 |
| R(34,61) | 1.5049 | R(109,117) | 1.4061 |
| R(35,36) | 1.084  | R(111,112) | 1.0867 |
| R(35,67) | 1.409  | R(113,114) | 1.0869 |
| R(37,42) | 1.5049 | R(113,121) | 1.4101 |
| R(38,39) | 1.1004 | R(115,116) | 1.0875 |
| R(38,40) | 1.0949 | R(115,121) | 1.4071 |
| R(38,41) | 1.095  | R(117,118) | 1.084  |
| R(42,43) | 1.0998 | R(119,120) | 1.087  |
|          |        | R(121,122) | 1.0868 |
